# Supplementary material
Source: Copernicus journal article supplement (doi:10.5194/acp-26-8695-2026)
Supplement: Supplementary file 1 [file acp-26-8695-2026-supplement.pdf]

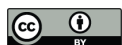

*Supplement of*

## **Wintertime photochemistry of acyl peroxy nitrates and ozone in South Korea during the ASIA-AQ campaign**

**Young Ro Lee et al.**

*Correspondence to:* L. Gregory Huey ([greg.huey@eas.gatech.edu](mailto:greg.huey@eas.gatech.edu))

The copyright of individual parts of the supplement might differ from the article licence.

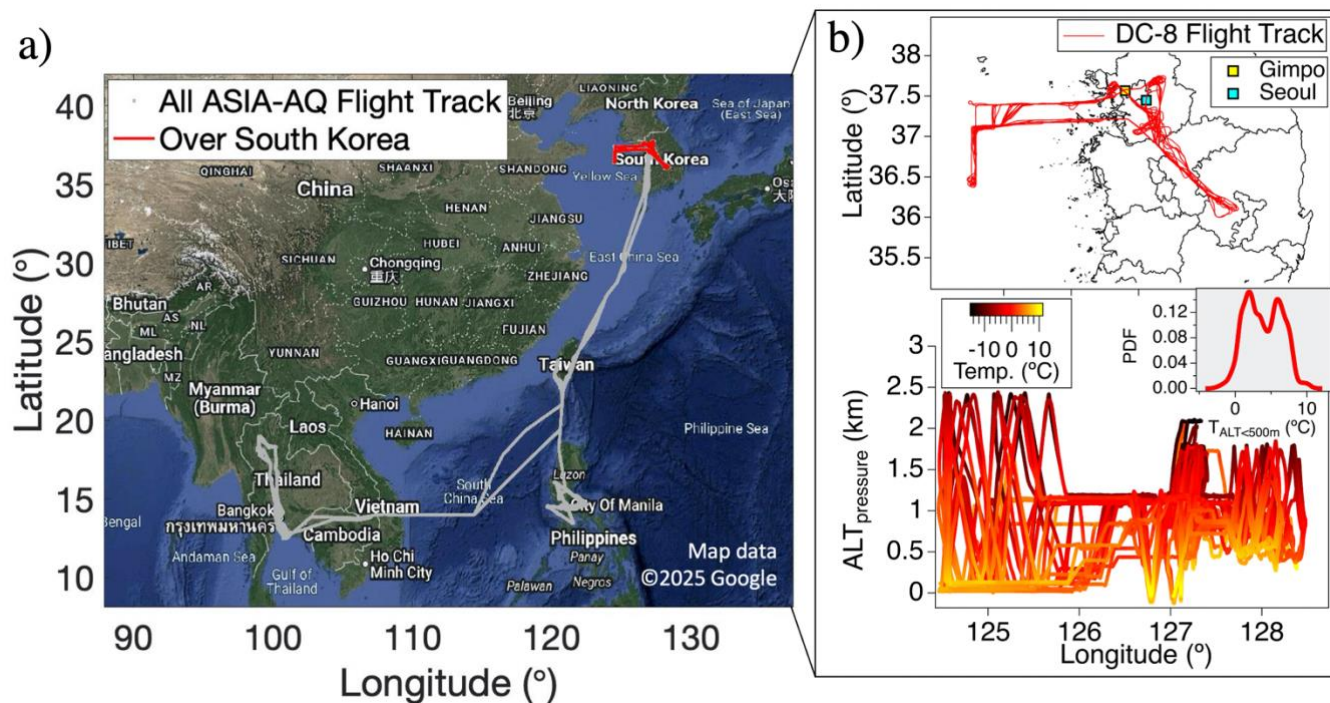

**Figure S1.** (a) Map of DC-8 flight paths for ASIA-AQ shown in grey, with the South Korea flights in red. (b) (top) The red line shows the DC-8 flight paths over South Korea, with yellow and cyan squares indicating Gimpo and Seoul Airports, respectively, which were used for low approaches. (bottom) Plot of altitude as a function of longitude and colored by temperature. The inset illustrates the probability distribution function (PDF) of temperature measured at altitudes below 500 m.

**Table S1.** Aircraft measurements aboard the NASA DC-8 aircraft used in this study.

| Measurement                                                                 | Instrument                                                                                                                                                                                  | Uncertainty                                                                                                        | Reference                                                            |
|-----------------------------------------------------------------------------|---------------------------------------------------------------------------------------------------------------------------------------------------------------------------------------------|--------------------------------------------------------------------------------------------------------------------|----------------------------------------------------------------------|
| Acyl peroxy nitrates (PANs)                                                 | Georgia Tech Thermal Dissociation Chemical Ionization Mass Spectrometry (GT TD-CIMS) using I <sup>-</sup> reagent ion                                                                       | 10–30%                                                                                                             | Slusher et al. (2004);<br>Ji et al. (2020)<br>Lee et al. (2019)      |
| NO                                                                          | Chemiluminescence                                                                                                                                                                           | 8%                                                                                                                 | Weinheimer et al. (1994)                                             |
| NO <sub>2</sub>                                                             | Compact Airborne NO <sub>2</sub> Experiment (CANOE)                                                                                                                                         | 10% ± 120 pptv                                                                                                     | St. Clair et al. (2019);<br>Bourgeois et al. (2022)                  |
| O <sub>3</sub>                                                              | Rapid O <sub>3</sub> Experiment (ROZE)                                                                                                                                                      | 6.2%                                                                                                               | Hannun et al. (2020)                                                 |
| CO, CH <sub>4</sub>                                                         | Differential Absorption Carbon monoxide Measurement (DACOM)                                                                                                                                 | 2–5%, 1%                                                                                                           | Sachse et al. (1987, 1991)                                           |
| Relative humidity                                                           | Diode Laser Hygrometer measurements of H <sub>2</sub> O                                                                                                                                     | 15%                                                                                                                | Diskin et al. (2002)                                                 |
| Ethane, alkenes, ethyltoluenes, trimethylbenzenes, α-pinene, β-pinene       | Whole Air Sampling and Gas Chromatography (WAS and GC)                                                                                                                                      | 5%                                                                                                                 | Simpson et al. (2020)                                                |
| C <sub>8</sub> -romatics, benzaldehyde                                      | Proton-transfer reaction mass spectrometer                                                                                                                                                  | 15%                                                                                                                | Reinecke et al. (2023)                                               |
| Volatile organic compounds (VOCs), oxygenated VOCs, isopropyl nitrate       | NSF NCAR Trace Organic Mass Analyzer with time-of-flight mass spectrometer (TOGA-TOF)                                                                                                       | 15–40%                                                                                                             | Apel et al. (2015);<br>Hornbrook et al. (2016)                       |
| Formaldehyde (CH <sub>2</sub> O)                                            | In Situ Airborne Formaldehyde (ISAF)                                                                                                                                                        | 10% + 10 pptv                                                                                                      | Cazorla et al. (2015)                                                |
| Particle concentrations (volume, number density, surface area) <sup>a</sup> | Ultra-High Sensitivity Aerosol Spectrometer (Droplet Measurement Technology UHSAS), Aerodynamic Particle Sizer (APS; TSI 3321), and Scanning Mobility Particle Sizer (SMPS; TSI model 3776) | 20%                                                                                                                | Moore et al. (2021)                                                  |
| HNO <sub>3</sub> , HCN, phenol, cresol, nitrophenol, nitroresol             | Caltech Chemical Ionization Mass Spectrometer (CIT-CIMS) using CF <sub>3</sub> O <sup>-</sup> reagent ion                                                                                   | 20% ± 25 pptv, 25% ± 35 pptv, 30% ± 20 pptv, 30% ± 10 pptv, 30% ± 10 pptv, 30% ± 10 pptv                           | Crouse et al. (2006)                                                 |
| Organic aerosol (OA), particulate nitrate (pNO <sub>3</sub> <sup>-</sup> )  | Aerosol Mass Spectrometer                                                                                                                                                                   | 19%, 18%                                                                                                           | Bahreini et al. (2009);<br>Nault et al. (2018);<br>Guo et al. (2021) |
| Photolysis frequencies ( <i>j</i> values)                                   | Charged-coupled device Actinic Flux Spectroradiometers (CAFS)                                                                                                                               | 12% <i>j</i> -NO <sub>2</sub> ,<br>20% <i>j</i> -O <sub>3</sub> , <i>j</i> (Acetone, MEK, BIACET)-20%,<br>20%, 16% | Hall et al. (2018)                                                   |

<sup>a</sup>Aerosol measurements target different aerosol size range where APS, UHSAS and SMPS targets approximately 0.5–5  $\mu\text{m}$ , 60–1000 nm and 3–80 nm.

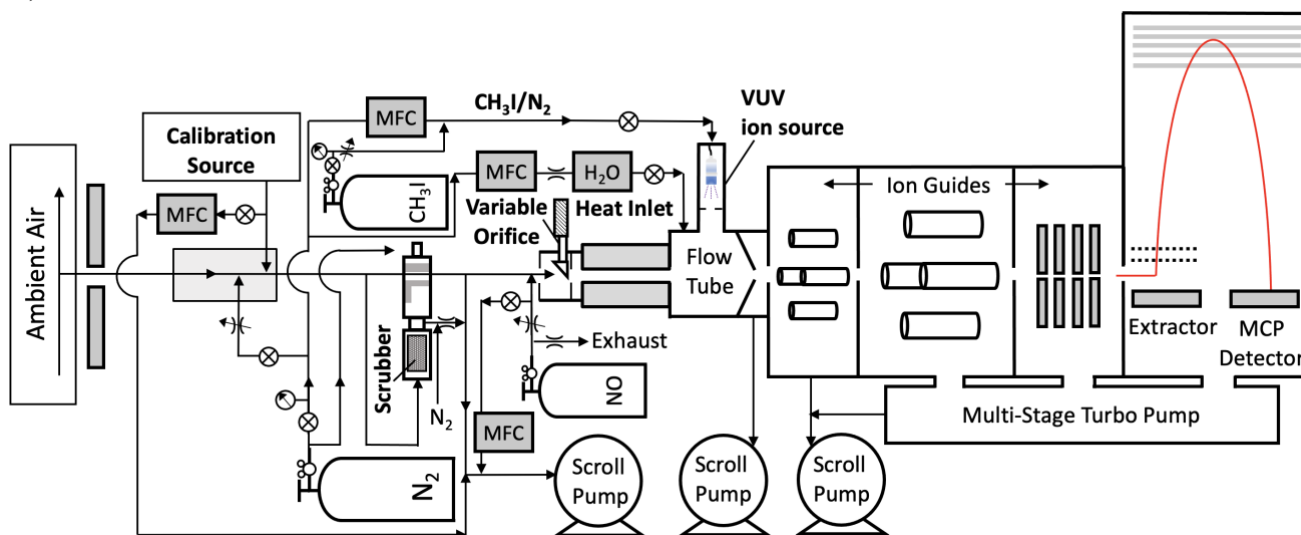

20 **Figure S2.** Schematic diagram of the Thermal Dissociation-Chemical Ionization Mass Spectrometer (TD-CIMS).

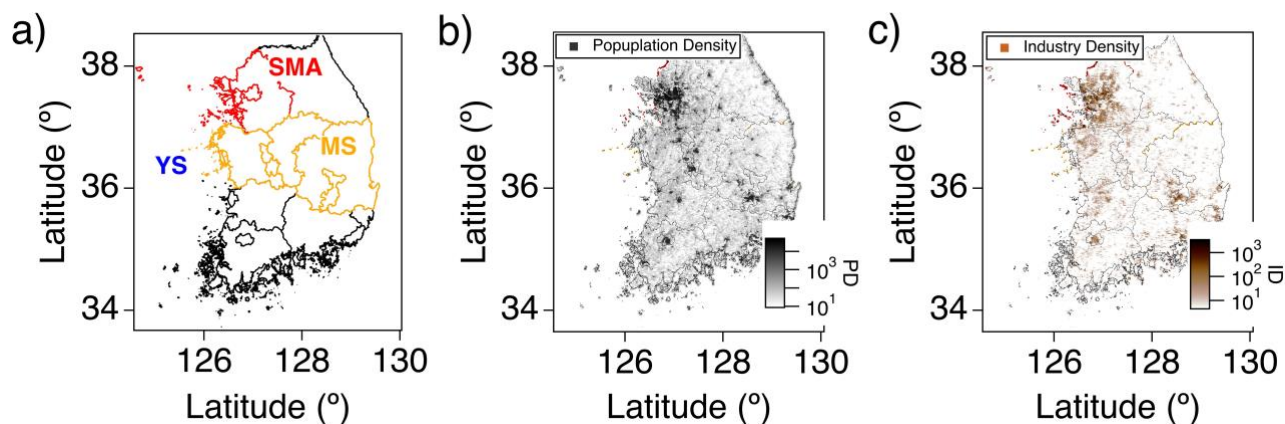

25 **Figure S3.** (a) Map of South Korea with geographic boundaries used to filter data. The Seoul Metropolitan Area (SMA) includes Seoul and suburban regions (Incheon and Gyeonggi provinces). The Mid and South (MS) region includes northern and southern Chungcheong provinces, Sejong, and northern Gyeongsang province. The Yellow Sea (YS) is the region to the west of the Korean Peninsula. (b) Map of South Korea colored by 1 km<sup>2</sup> population density (PD). (c) Map of South Korea colored by 1 km<sup>2</sup> industrial facility density (ID).

## S2 Kinetic calculations for instantaneous production rates

**Table S2.** Volatile organic compounds (VOCs) used in kinetic calculations with corresponding hydroxyl radical (OH) reaction rate coefficients ( $k_{\text{OH}}$ ), ozone yields ( $\Upsilon$ ) and alkyl nitrate branching ratios ( $\alpha$ ). For acetaldehyde, acrolein and i-butanal,  $\alpha$  denotes hydrogen abstraction ratios.

|                           | $k_{\text{OH}} @ 298 \text{ K}^{\text{a}}$ | $\Upsilon^{\text{b}}$ | $\alpha^{\text{c}}$ |                        | $k_{\text{OH}} @ 298 \text{ K}$ | $\Upsilon^{\text{b}}$ | $\alpha^{\text{c}}$ |
|---------------------------|--------------------------------------------|-----------------------|---------------------|------------------------|---------------------------------|-----------------------|---------------------|
| <b>Alkanes</b>            |                                            |                       |                     |                        |                                 |                       |                     |
| Ethane                    | $2.48 \times 10^{-13}$                     | 2.00                  | 0.019               | 2-Methylpentane        | $5.3 \times 10^{-12}$           | 2.85                  | 0.097               |
| Propane                   | $1.09 \times 10^{-12}$                     | 2.00                  | 0.036               | 3-Methylpentane        | $5.4 \times 10^{-12}$           | 2.85                  | 0.109               |
| n-Butane                  | $2.36 \times 10^{-12}$                     | 2.85                  | 0.077               | n-Heptane              | $6.76 \times 10^{-12}$          | 2.85                  | 0.178               |
| i-Butane                  | $2.12 \times 10^{-12}$                     | 2.85                  | 0.096               | n-Octane               | $8.11 \times 10^{-12}$          | 2.85                  | 0.226               |
| n-Pentane                 | $3.8 \times 10^{-12}$                      | 2.85                  | 0.105               | n-Nonane               | $9.7 \times 10^{-12}$           | 2.85                  | 0.393               |
| i-Pentane                 | $3.6 \times 10^{-12}$                      | 2.85                  | 0.07                | 2,2,4-Trimethylpentane | $3.34 \times 10^{-12}$          | 2.85                  | 0.14                |
| n-Hexane                  | $5.2 \times 10^{-12}$                      | 2.85                  | 0.141               |                        |                                 |                       |                     |
| <b>Alkenes</b>            |                                            |                       |                     | <b>Aromatics</b>       |                                 |                       |                     |
| Ethene                    | $8.52 \times 10^{-12}$                     | 2                     | 0.013 <sup>d</sup>  | Benzene                | $1.22 \times 10^{-12}$          | 2                     | 0.034               |
| Propene                   | $2.63 \times 10^{-11}$                     | 2                     | 0.041 <sup>d</sup>  | Toluene                | $5.63 \times 10^{-12}$          | 2                     | 0.029               |
| 1-Butene                  | $3.14 \times 10^{-11}$                     | 2                     | 0.12 <sup>d</sup>   | Ethylbenzene           | $7 \times 10^{-12}$             | 2                     | 0.072               |
| cis-2-Butene              | $5.64 \times 10^{-11}$                     | 2                     | 0.12 <sup>d</sup>   | (m + p)-Xylenes        | $1.87 \times 10^{-11}$          | 2                     | 0.086               |
| trans-2-Butene            | $6.4 \times 10^{-11}$                      | 2                     | 0.12 <sup>d</sup>   | o-Xylene               | $1.36 \times 10^{-11}$          | 2                     | 0.081               |
| 1,3-Butadiene             | $6.66 \times 10^{-11}$                     | 2                     | 0.10 <sup>d</sup>   | Styrene                | $5.8 \times 10^{-11}$           | 2                     | 0.1                 |
| 1-Pentene                 | $3.14 \times 10^{-11}$                     | 2                     | 0.15 <sup>d</sup>   | 1,2,3-Trimethylbenzene | $3.3 \times 10^{-11}$           | 2                     | 0.105               |
| $\alpha$ -Pinene          | $5.25 \times 10^{-11}$                     | 2.85                  | 0.18                | 1,2,4-Trimethylbenzene | $3.3 \times 10^{-11}$           | 2                     | 0.119               |
| $\beta$ -Pinene           | $7.89 \times 10^{-11}$                     | 2.85                  | 0.24                | 1,3,5-Trimethylbenzene | $5.7 \times 10^{-11}$           | 2                     | 0.031               |
|                           |                                            |                       |                     | 2-Ethyltoluene         | $1.19 \times 10^{-11}$          | 2                     | 0.106               |
|                           |                                            |                       |                     | 3-Ethyltoluene         | $1.86 \times 10^{-11}$          | 2                     | 0.094               |
|                           |                                            |                       |                     | 4-Ethyltoluene         | $1.18 \times 10^{-11}$          | 2                     | 0.137               |
| <b>Oxygenated Species</b> |                                            |                       |                     |                        |                                 |                       |                     |
| CO                        | $2.39 \times 10^{-13}$                     | 1                     | -                   | Benzaldehyde           | $1.26 \times 10^{-11}$          | 2.85                  | -                   |
| Formaldehyde              | $8.37 \times 10^{-12}$                     | 1                     | -                   | Methyl formate         | $2 \times 10^{-13}$             | 2                     | -                   |
| Formaldehyde (hv)         | -                                          | 2                     | -                   | Methyl acetate         | $3.49 \times 10^{-13}$          | 2                     | -                   |
| Acetaldehyde              | $1.58 \times 10^{-11}$                     | 3                     | 0.95 <sup>e</sup>   | Ethyl acetate          | $1.68 \times 10^{-12}$          | 2                     | -                   |
| Acrolein                  | $2 \times 10^{-11}$                        | 2.85                  | 0.68 <sup>e</sup>   | Acetone                | $1.75 \times 10^{-13}$          | 2.85                  | -                   |
| Propanal                  | $1.91 \times 10^{-11}$                     | 2.85                  | -                   | MEK                    | $1.11 \times 10^{-12}$          | 2                     | -                   |
| Butanal                   | $2.38 \times 10^{-11}$                     | 2.85                  | -                   | Methanol               | $9 \times 10^{-13}$             | 1                     | -                   |
| i-Butanal                 | $2.69 \times 10^{-11}$                     | 2.85                  | 0.887 <sup>e</sup>  | Ethanol                | $3.21 \times 10^{-12}$          | 1                     | -                   |
| Pentanal                  | $2.85 \times 10^{-11}$                     | 2.85                  | -                   | i-Propanol             | $5.09 \times 10^{-12}$          | 1                     | -                   |
| Butenal                   | $3.4 \times 10^{-11}$                      | 2.85                  | -                   | MVK                    | $2.01 \times 10^{-11}$          | 2                     | 0.11                |
| Methacrolein              | $2.86 \times 10^{-11}$                     | 2.5                   | 0.15                | BIACET                 | $2.39 \times 10^{-13}$          | 2                     | -                   |
| <b>Other</b>              |                                            |                       |                     |                        |                                 |                       |                     |
| CH <sub>4</sub>           | $6.34 \times 10^{-15}$                     | 2                     | -                   | Ethyne                 | $8.74 \times 10^{-13}$          | 1.2                   | 0.09                |

<sup>a</sup>Reaction rate coefficients with OH ( $k_{\text{OH}}$ , in units of  $\text{cm}^3 \text{ molecule}^{-1} \text{ s}^{-1}$ ) from the Master Chemical Mechanism (MCM) v3.3.1, consistent with IUPAC recommendation.

<sup>b</sup>Ozone yields from Rosen et al. (2004).

<sup>c</sup>Alkyl nitrate branching ratios adapted from Perring et al. (2013) unless noted otherwise.

<sup>d</sup>Hydroxynitrates branching ratios from Teng et al. (2015).

<sup>e</sup>Hydrogen abstraction branching ratios for the selected aldehydes.

30

### S3 Observational constraints for 0-D box model simulations and sensitivity analysis

**Table S3.** Airborne observations used to constrain flight steady-state box model simulations and corresponding compound name in MCM v3.3.1.

| Observations                  | Instrument        | MCM name  | Observation            | Instrument | MCM name |
|-------------------------------|-------------------|-----------|------------------------|------------|----------|
| <b>non-VOCs</b>               |                   |           |                        |            |          |
| O <sub>3</sub>                | ROZE              | O3        | PPN                    | GT TD-CIMS | PPN      |
| NO                            | Chemiluminescence | NO        | PBN                    | GT TD-CIMS | PIPN     |
| NO <sub>2</sub>               | CANOE             | NO2       | APAN                   | GT TD-CIMS | ACRPAN   |
| H <sub>2</sub> O <sub>2</sub> | CIT-CIMS          | H2O2      | PBzN                   | GT TD-CIMS | PBZN     |
| PAN                           | GT TD-CIMS        | PAN       |                        |            |          |
| <b>VOCs</b>                   |                   |           |                        |            |          |
| CO                            | DACOM             | CO        | 1,2,3-Trimethylbenzene | WAS        | TM123B   |
| Ethyne                        | WAS               | C2H2      | 1,2,4-Trimethylbenzene | WAS        | TM124B   |
| Ethene                        | WAS               | C2H4      | 1,3,5-Trimethylbenzene | WAS        | TM135B   |
| Propene                       | WAS               | C3H6      | CH <sub>4</sub>        | DACOM      | CH4      |
| 1-Butene                      | WAS               | BUT1ENE   | CH <sub>2</sub> O      | ISAF       | HCHO     |
| i-Butene                      | WAS               | MEPROPENE | Methyl formate         | TOGA       | CH3OCHO  |
| cis-2-Butene                  | WAS               | CBUT2ENE  | Methyl acetate         | TOGA       | METHACET |
| trans-2-Butene                | WAS               | TBUT2ENE  | Ethyl acetate          | TOGA       | ETHACET  |
| 1,3-Butadiene                 | WAS               | C4H6      | Acetone                | TOGA       | CH3COCH3 |
| 1-Pentene                     | WAS               | C5H8      | MEK                    | TOGA       | MEK      |
| Ethane                        | WAS               | C2H6      | Methanol               | TOGA       | CH3OH    |
| Propane                       | TOGA              | C3H8      | Ethanol                | TOGA       | C2H5OH   |
| n-Butane                      | TOGA              | NC4H10    | i-Propanol             | TOGA       | IPROPOL  |
| i-Butane                      | TOGA              | IC4H10    | MVK                    | TOGA       | MVK      |
| i-Pentane                     | TOGA              | IC5H12    | 2,3-Butanedione        | TOGA       | BIACET   |
| n-Pentane                     | TOGA              | NC5H12    | 2-Pentanone            | TOGA       | MPRK     |
| n-Hexane                      | TOGA              | NC6H14    | 3-Pentanone            | TOGA       | DIEK     |
| n-Heptane                     | TOGA              | NC7H16    | Acetaldehyde           | TOGA       | CH3CHO   |
| n-Octane                      | TOGA              | NC8H18    | Propanal               | TOGA       | C2H5CHO  |
| n-Nonane                      | TOGA              | NC9H20    | Butanal                | TOGA       | C3H7CHO  |
| Benzene                       | TOGA              | BENZENE   | i-Butanal              | TOGA       | IPRCHO   |
| Toluene                       | TOGA              | TOLUENE   | Acrolein               | TOGA       | ACR      |
| Ethylbenzene                  | TOGA              | EBENZ     | Benzaldehyde           | PTR-MS     | BENZAL   |
| o-Xylene                      | TOGA              | OXYL      | Pentanal               | TOGA       | C4H9CHO  |
| m-Xylene                      | TOGA              | MXYL      | Methacrolein           | TOGA       | MACR     |
| p-Xylene                      | TOGA              | PXYL      | 2-Butenals             | TOGA       | C4ALD8   |
| 2-Ethyltoluene                | WAS               | OETHTOL   | α-Pinene               | WAS        | APINENE  |
| 3-Ethyltoluene                | WAS               | METHTOL   | β-Pinene               | WAS        | BPINENE  |
| 4-Ethyltoluene                | WAS               | PETHTOL   | Styrene                | TOGA       | STYRENE  |

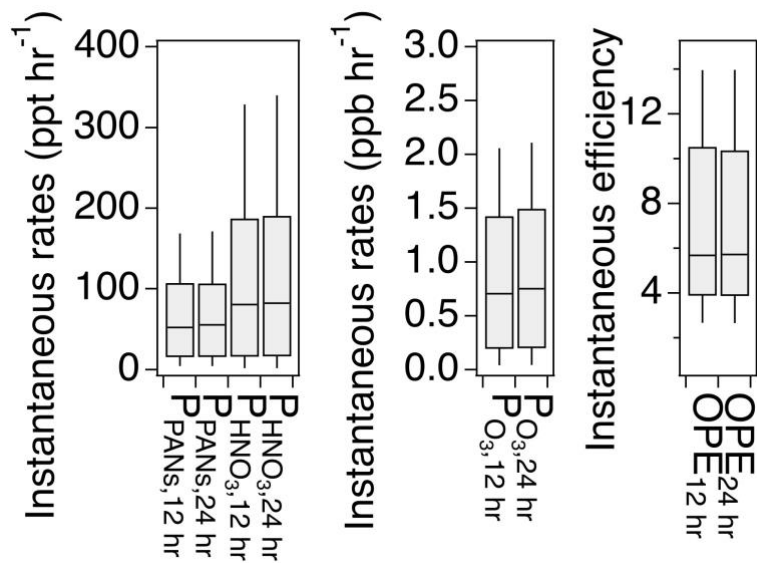

**Figure S4.** Box plots for modeled  $P(\text{PANs})$ ,  $P(\text{HNO}_3)$ ,  $P(\text{O}_3)$  and OPE using 12-hour and 24-hour lifetimes.

S4 Correlations of PANs with gaseous and particulate compounds over the campaign domain

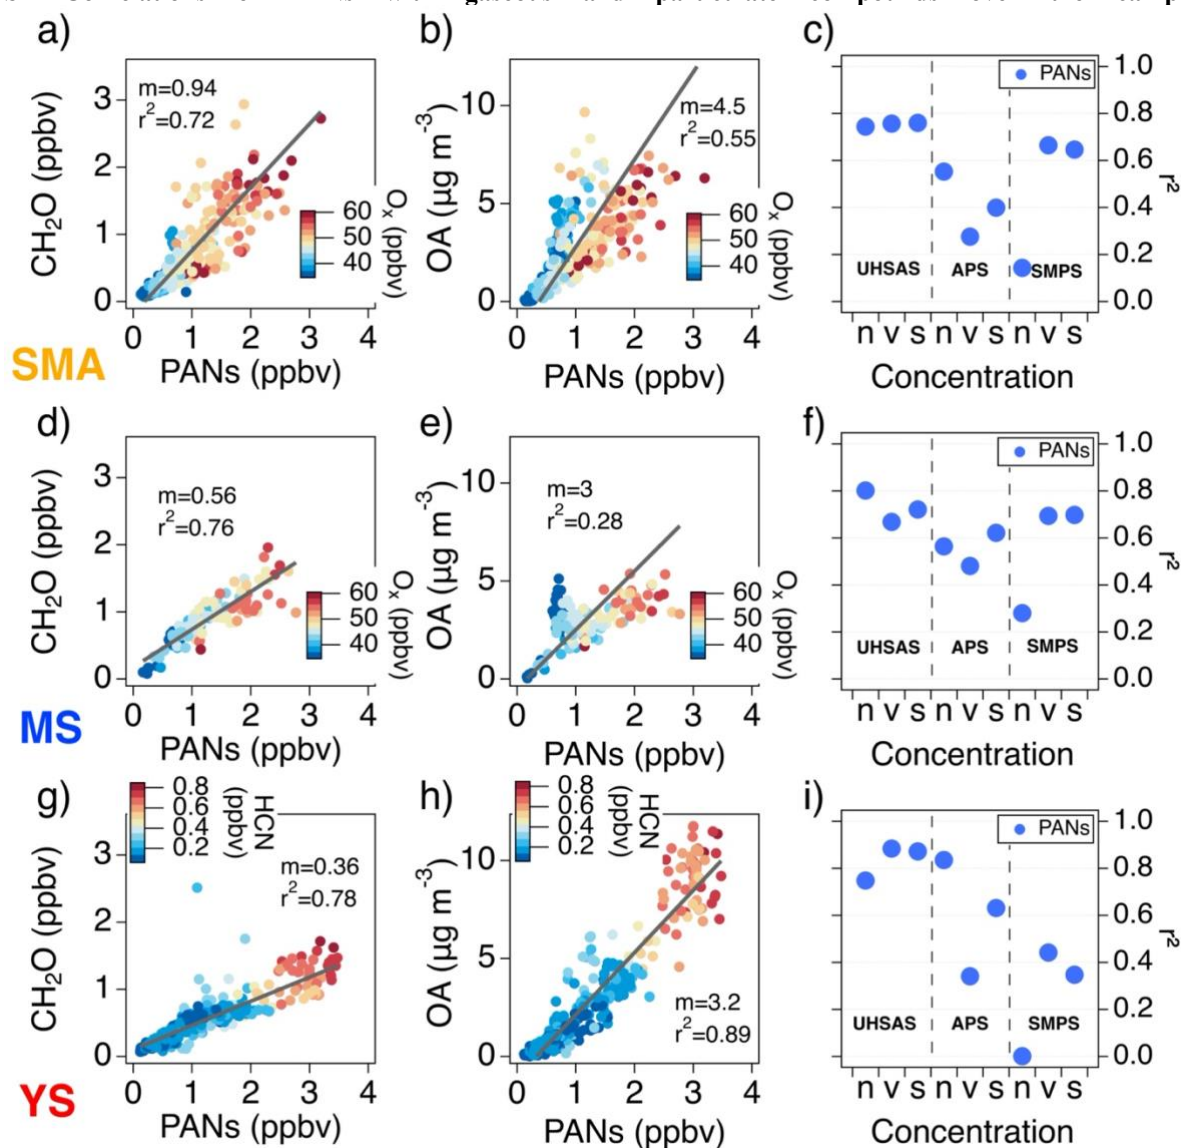

40 **Figure S5.** Scatter plots of PANs with (a, d, g) CH<sub>2</sub>O and (b, e, h) OA over the SMA, MS and YS, respectively, along with linear regression slopes ( $m$ ) and  $r^2$  values. Markers are colored by odd oxygen (O<sub>x</sub>; defined as O<sub>3</sub> + NO<sub>2</sub>) for the SMA and MS and by HCN for the YS. Right panels (c, f, i) show  $r^2$  values for correlations between PANs and aerosol number (n), volume (v), and surface area (s) concentrations measured by the Ultra-High Sensitivity Aerosol Spectrometer (UHSAS), Aerodynamic Particle Sizer (APS), and Scanning Mobility Particle Sizer (SMPS) over the SMA, MS and YS, respectively.

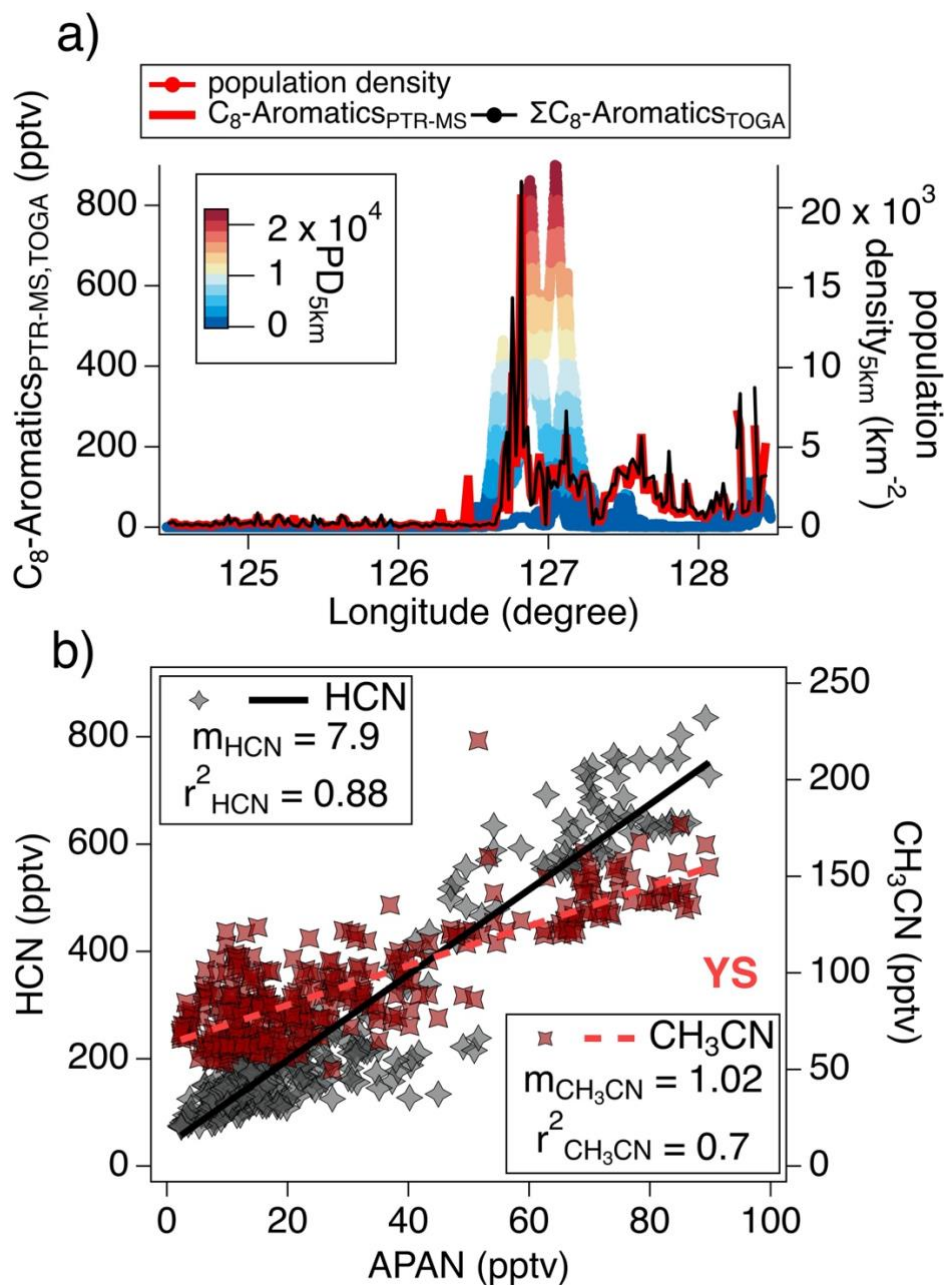

45

**Figure S6.** (a) Longitudinal distribution of median C<sub>8</sub>-aromatics measured by PTR-MS and TOGA-TOF in 0.02° longitude bins (left axis), along with population density within 5-km of the DC-8 measurements (PD<sub>5km</sub>) (right axis). (b) Scatter plots of HCN and CH<sub>3</sub>CN versus APAN observed over YS, shown on the left and right axes, respectively.

## S5.1 Estimation of OH exposure

To incorporate a qualitative measure of the degree of photochemical processing in air masses, we estimate OH exposure (OH $\Delta$ t), defined as the product of OH concentration and time, averaged over the photochemical age of an air mass (McKeen and Liu, 1993; Parrish et al., 2007). This estimation is based on the ratio of alkanes to their corresponding alkyl nitrates (ANs) in parent-daughter relationships, using Eq. (S1) (Bertman et al., 1995; Farmer et al., 2011; Romer et al., 2018). With the assumption that the ANs are produced exclusively from secondary formation of parent oxidation, the term for initial conditions in Eq. (S1) can be neglected (Bertman et al., 1995). This approach is particularly advantageous over an alternative method that estimate OH $\Delta$ t from the relative decay of VOC pairs with distinct atmospheric lifetimes, as the alternative method requires initial conditions (i.e., emission ratios), which are difficult to constrain in regions with complex source characteristics such as South Korea.

Specifically, we use the observed ratio of isopropyl nitrate (IPN) to propane for the OH $\Delta$ t estimation. IPN is the dominant form of propyl nitrate, almost exclusively formed from oxidation of propane (Fischer et al., 2018). With increasing degree of photochemical processing, the isopropyl nitrate to propane ratio is expected to increase. In Eq. (S1), the alkyl nitrate branching ratios of propane ( $\alpha_{\text{propane}}$ ) are from Perring et al. (2013) (Table S2), and  $\chi_{H-abs}$  represents the fraction of hydrogen abstraction (0.736) by OH from the secondary carbon of propane, adapted from MCM v.3.3.1, leading to isopropyl peroxy radical.

$$[\text{OH}]\Delta t = \frac{1}{k_{\text{Propane}+\text{OH}} - k_{\text{IPN}+\text{OH}}} \ln\left(1 - \frac{\text{IPN}}{\text{Propane}} \left(\frac{k_{\text{IPN}+\text{OH}} - k_{\text{Propane}+\text{OH}}}{\chi_{H-abs} \alpha_{\text{propane}} k_{\text{Propane}+\text{OH}}}\right)\right) \quad (\text{S1})$$

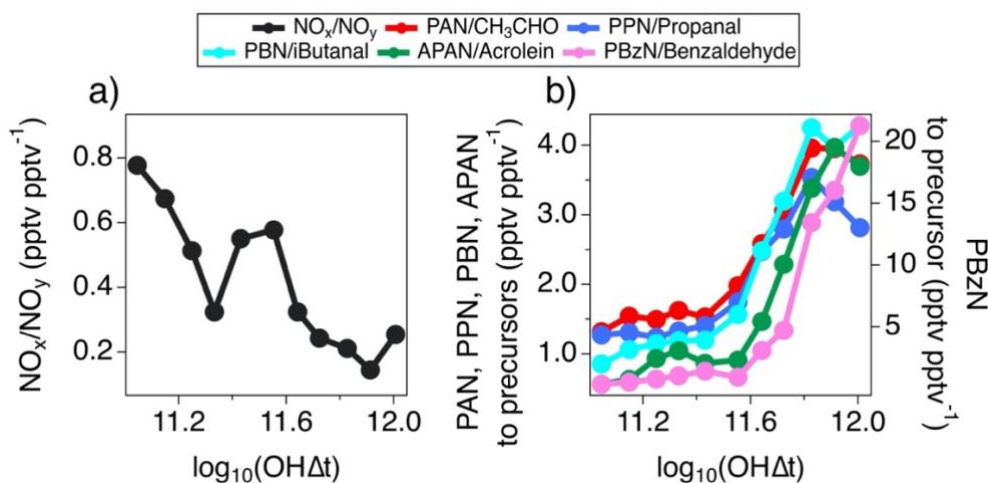

**Figure S7.** (a) The median ratios of  $\text{NO}_x$  to  $\text{NO}_y$  (approximated as PANs +  $\text{HNO}_3$  +  $\text{pNO}_3^-$ ) as a function of logarithmic OH exposure. (b) The median ratios of PANs to corresponding aldehyde precursor as a function of logarithmic OH exposure.

70 **S5.2 Inferred  $P(\text{PAN})$  from non-acetaldehyde sources**

Production rates of PAN ( $P(\text{PAN})$ ) from non-acetaldehyde precursors (inferred  $P(\text{PAN})_{\text{w/o CH}_3\text{CHO}}$ ) were estimated using kinetic calculations in Eq. (S2) and Eq. (S3). This approach assumes that the observed PAN-to-homologue ratios reflect the relative rates of their local production at the point of measurement. In Eq. (S2), the observed PAN-to-homologue ratios are equated to the relative production rates of PAN to PAN homologues, with  $P(\text{PAN})$  expressed as the sum of production rates from oxidation of acetaldehyde and non-acetaldehyde precursors,  $P(\text{PAN})_{\text{CH}_3\text{CHO}}$  and  $P(\text{PAN})_{\text{w/o CH}_3\text{CHO}}$ , respectively. Rearranging Eq. (S2) for  $P(\text{PAN})_{\text{w/o CH}_3\text{CHO}}$  yields Eq. (S3), in which  $P(\text{PAN})_{\text{w/o CH}_3\text{CHO}}$  is expressed as the product of the observed PAN-to-homologue ratio and the production rates of homologues, subtracted by  $P(\text{PAN})_{\text{CH}_3\text{CHO}}$ . The inferred  $P(\text{PAN})_{\text{w/o CH}_3\text{CHO}}$  from Eq. (S3) is used to provide an independent observational constraint on precursor contributions to  $P(\text{PAN})$ , complementing model-based estimates.

80

$$\frac{\text{PAN}}{\text{PAN homologues}} = \frac{\beta_{\text{PAN}} (k_{\text{OH}+\text{CH}_3\text{CHO}}[\text{OH}][\text{CH}_3\text{CHO}]) + P(\text{PAN})_{\text{w/o CH}_3\text{CHO}}}{\beta_{\text{PAN}} \alpha_{\text{H abs, PAN homologues}} k_{\text{OH}+\text{OVOC}_{\text{PAN homologues}}} [\text{OH}][\text{OVOC}]_{\text{PAN homologues}}}$$

, where  $\beta_{\text{PAN}} = \frac{k_{\text{PA}+\text{NO}_2}[\text{NO}_2]}{k_{\text{PA}+\text{NO}_2}[\text{NO}_2] + k_{\text{PA}+\text{NO}}[\text{NO}]}$  (S2)

$$P(\text{PAN})_{\text{w/o CH}_3\text{CHO}} = \frac{\text{PAN}(\beta_{\text{PAN}} \alpha_{\text{Hydrogen abstraction, PAN homologues}} k_{\text{OH}+\text{OVOC}_{\text{PAN homologues}}} [\text{OH}][\text{OVOC}]_{\text{PAN homologues}})}{\text{PAN homologues}} - \beta_{\text{PAN}} (k_{\text{OH}+\text{CH}_3\text{CHO}}[\text{OH}][\text{CH}_3\text{CHO}])$$
 (S3)

### S5.3 Kinetic investigation on relative NO<sub>x</sub> loss pathways

We investigate the fractional contribution of PANs production to total NO<sub>x</sub> loss ( $\chi_{\text{PANs-kc}}$ ) using the kinetic calculations described in Eq. (S4)–Eq. (S6).  $\chi_{\text{PANs-kc}}$  is defined as the production rate of PANs relative to the sum of PANs ( $P(\text{PANs})$ ) and HNO<sub>3</sub> ( $P(\text{HNO}_3)$ ) production rates, with both terms derived from Eq. (4) and Eq. (5) in the main manuscript. Following Eq. (1), the OH reactivity of NO<sub>2</sub> and aldehydes can be expressed as  $R_{\text{NO}_2}$  and  $R_{\text{ALD}}$ , respectively, allowing Eq. (S4) to be simplified to Eq. (S5). Substituting the explicit form of  $\beta_{\text{PANs}}$ , shown in Eq. (S2), and normalizing by  $R_{\text{ALD}}$  yields Eq. (S6). This equation predicts a negative dependence of  $\chi_{\text{PANs-kc}}$  on both  $R_{\text{NO}_2}/R_{\text{ALD}}$  and  $\text{NO}/R_{\text{ALD}}$  broadly reflecting the ratio of NO<sub>x</sub> to aldehydes. The contribution of the OVOC photolysis term ( $J_{\text{OVOCs}}[\text{OVOCs}]$ ) to  $\chi_{\text{PANs-kc}}$  is minimal (<2% increase in  $\chi_{\text{PANs-kc}}$  for a factor of two increase in  $J_{\text{OVOCs}}[\text{OVOCs}]$ ), because it is divided by much larger values (i.e.,  $R_{\text{ALD}}[\text{OH}]$ ) and appears in both numerator and denominator.

$$\frac{P(\text{PANs})}{P(\text{HNO}_3)+P(\text{PANs})} = \frac{\beta_{\text{PANs}}(k_{\text{OH+Aldehydes}}[\text{Aldehydes}][\text{OH}]+J_{\text{OVOCs}}[\text{OVOCs}])}{k_{\text{OH+NO}_2}[\text{NO}_2][\text{OH}]+\beta_{\text{PANs}}(k_{\text{OH+Aldehydes}}[\text{Aldehydes}][\text{OH}]+J_{\text{OVOCs}}[\text{OVOCs}])} \quad (\text{S4})$$

$$\frac{P(\text{PANs})}{P(\text{HNO}_3)+P(\text{PANs})} = \frac{\beta_{\text{PANs}}R_{\text{ALD}}[\text{OH}]+J_{\text{OVOCs}}[\text{OVOCs}]}{R_{\text{NO}_2}[\text{OH}]+\beta_{\text{PANs}}R_{\text{ALD}}[\text{OH}]+J_{\text{OVOCs}}[\text{OVOCs}]} \quad (\text{S5})$$

$$\frac{P(\text{PANs})}{P(\text{HNO}_3)+P(\text{PANs})} = \frac{1+\frac{J_{\text{OVOCs}}[\text{OVOCs}]}{R_{\text{ALD}}[\text{OH}]}}{1+\frac{R_{\text{NO}_2}}{R_{\text{ALD}}}+\frac{k_{\text{OH+NO}_2}k_{\text{PA+NO}}[\text{NO}]}{k_{\text{PA+NO}_2}R_{\text{ALD}}}+\frac{J_{\text{OVOCs}}[\text{OVOCs}]}{R_{\text{ALD}}[\text{OH}]}} \quad (\text{S6})$$

### S6 Model sensitivity analysis

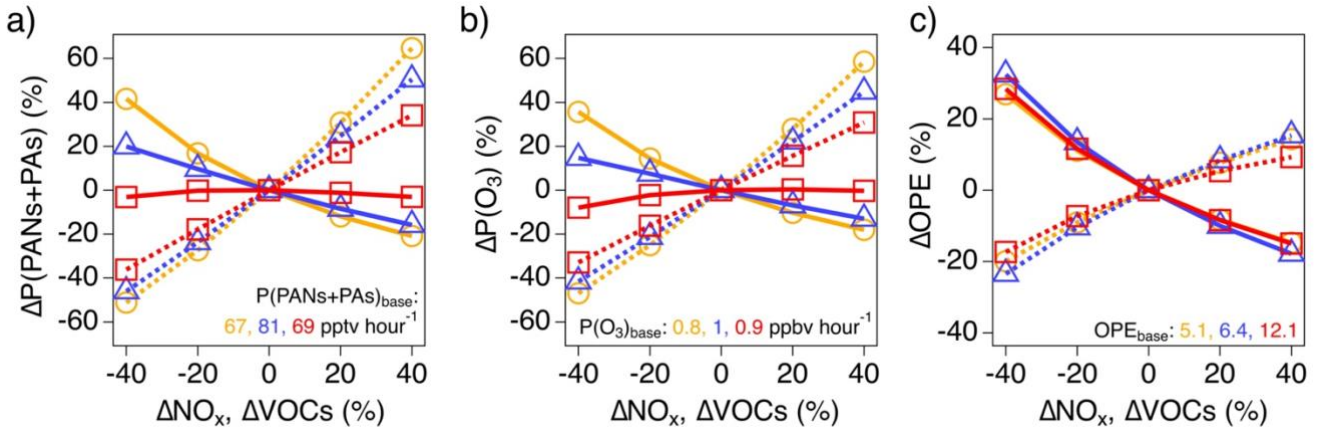

95 **Figure S8.** Model sensitivity of (a)  $P(\text{PANs})$ , (b)  $P(\text{O}_3)$  and (c) OPE to  $\pm 40\%$  changes in  $\text{NO}_x$  and VOCs constraints, along with the corresponding base-case values.

## References

- 100 Apel, E. C., Hornbrook, R. S., Hills, A. J., Blake, N. J., Barth, M. C., Weinheimer, A., Cantrell, C., Rutledge, S. A., Basarab, B., Crawford, J., Diskin, G., Homeyer, C. R., Campos, T., Flocke, F., and Fried, A.: Upper tropospheric ozone production from lightning  $\text{NO}_x$ -impacted convection: Smoke ingestion case study from the DC3 campaign, *J. Geophys. Res.-Atmos.*, 120, 2505–2523, <https://doi.org/10.1002/2014JD022121>, 2015.
- 105 Bahreini, R., Ervens, B., Middlebrook, A. M., Warneke, C., de Gouw, J. A., DeCarlo, P. F., Jimenez, J. L., Brock, C. A., Neuman, J. A., Ryerson, T. B., Stark, H., Atlas, E., Brioude, J., Fried, A., Holloway, J. S., Peischl, J., Richter, D., Walega, J., Weibring, P., Wollny, A. G., and Fehsenfeld, F. C.: Organic aerosol formation in urban and industrial plumes near Houston and Dallas, Texas, *J. Geophys. Res.-Atmos.*, 114, D00F16, <https://doi.org/10.1029/2008JD011493>, 2009.
- Bertman, S. B., Roberts, J. M., Parrish, D. D., Buhr, M. P., Goldan, P. D., Kuster, W. C., Fehsenfeld, F. C., Montzka, S. A., and Westberg, H.: Evolution of alkyl nitrates with air mass age, *J. Geophys. Res.-Atmos.*, 100, 22805–22813, <https://doi.org/10.1029/95JD02030>, 1995.
- 110 Bourgeois, I., Peischl, J., Neuman, J. A., Brown, S. S., Allen, H. M., Campuzano-Jost, P., Coggon, M. M., DiGangi, J. P., Diskin, G. S., Gilman, J. B., Gkatzelis, G. I., Guo, H., Halliday, H. A., Hanisco, T. F., Holmes, C. D., Huey, L. G., Jimenez, J. L., Lamplugh, A. D., Lee, Y. R., Lindaas, J., Moore, R. H., Nault, B. A., Nowak, J. B., Pagonis, D., Rickly, P. S., Robinson, M. A., Rollins, A. W., Selimovic, V., St. Clair, J. M., Tanner, D., Vasquez, K. T., Veres, P. R., Warneke, C., Wennberg, P. O., Washenfelder, R. A., Wiggins, E. B., Womack, C. C., Xu, L., Zarzana, K. J., and Ryerson, T. B.: Comparison of airborne measurements of  $\text{NO}$ ,  $\text{NO}_2$ ,  $\text{HONO}$ ,  $\text{NO}_y$ , and  $\text{CO}$  during FIREX-AQ, *Atmos. Meas. Tech.*, 15, 4901–4930, <https://doi.org/10.5194/amt-15-4901-2022>, 2022.
- Cazorla, M., Wolfe, G. M., Bailey, S. A., Swanson, A. K., Arkinson, H. L., and Hanisco, T. F.: A new airborne laser-induced fluorescence instrument for in situ detection of formaldehyde throughout the troposphere and lower stratosphere, *Atmos. Meas. Tech.*, 8, 541–552, <https://doi.org/10.5194/amt-8-541-2015>, 2015.
- 120 Crouse, J. D., McKinney, K. A., Kwan, A. J., and Wennberg, P. O.: Measurement of gas-phase hydroperoxides by chemical ionization mass spectrometry, *Anal. Chem.*, 78, 6726–6732, <https://doi.org/10.1021/ac0604235>, 2006.
- de Gouw, J. A., Gilman, J. B., Kim, S.-W., Lerner, B. M., Isaacman-VanWertz, G., McDonald, B. C., Warneke, C., Kuster, W. C., Lefer, B. L., Griffith, S. M., Dusanter, S., Stevens, P. S., and Stutz, J.: Chemistry of Volatile Organic Compounds in the Los Angeles basin: Nighttime Removal of Alkenes and Determination of Emission Ratios, *J. Geophys. Res.-Atmos.*, 122, 11843–11861, <https://doi.org/10.1002/2017JD027459>, 2017.
- 125 Diskin, G. S., Podolske, J. R., Sachse, G. W., and Slate, T. A.: Open-path airborne tunable diode laser hygrometer, *Proc. SPIE*, 4817, 196–204, <https://doi.org/10.1117/12.453736>, 2002.
- Farmer, D. K., Perring, A. E., Wooldridge, P. J., Blake, D. R., Baker, A., Meinardi, S., Huey, L. G., Tanner, D., Vargas, O., and Cohen, R. C.: Impact of organic nitrates on urban ozone production, *Atmos. Chem. Phys.*, 11, 4085–4094, <https://doi.org/10.5194/acp-11-4085-2011>, 2011.
- 130

- Fisher, J. A., Atlas, E. L., Barletta, B., Meinardi, S., Blake, D. R., Thompson, C. R., Ryerson, T. B., Peischl, J., Tzompa-Sosa, Z. A., and Murray, L. T.: Methyl, ethyl, and propyl nitrates: global distribution and impacts on reactive nitrogen in remote marine environments, *J. Geophys. Res.-Atmos.*, 123, 12429–12451, <https://doi.org/10.1029/2018JD029046>, 2018.
- 135 Guo, H., Campuzano-Jost, P., Nault, B. A., Day, D. A., Schroder, J. C., Kim, D., Dibb, J. E., Dollner, M., Weinzierl, B., and Jimenez, J. L.: The importance of size ranges in aerosol instrument intercomparisons: a case study for the Atmospheric Tomography Mission, *Atmos. Meas. Tech.*, 14, 3631–3655, <https://doi.org/10.5194/amt-14-3631-2021>, 2021.
- 140 Hall, S. R., Ullmann, K., Prather, M. J., Flynn, C. M., Murray, L. T., Fiore, A. M., Correa, G., Strode, S. A., Steenrod, S. D., Lamarque, J.-F., Guth, J., Josse, B., Flemming, J., Huijnen, V., Abraham, N. L., and Archibald, A. T.: Cloud impacts on photochemistry: building a climatology of photolysis rates from the Atmospheric Tomography mission, *Atmos. Chem. Phys.*, 18, 16809–16828, <https://doi.org/10.5194/acp-18-16809-2018>, 2018.
- Hannun, R. A., Swanson, A. K., Bailey, S. A., Hanisco, T. F., Bui, T. P., Bourgeois, I., Peischl, J., and Ryerson, T. B.: A cavity-enhanced ultraviolet absorption instrument for high-precision, fast-time-response ozone measurements, *Atmos. Meas. Tech.*, 13, 6877–6887, <https://doi.org/10.5194/amt-13-6877-2020>, 2020.
- 145 Hornbrook, R. S., Hills, A. J., Riemer, D., Abdelhamid, A., Flocke, F. M., Hall, S. R., Huey, L. G., Knapp, D. J., Liao, J., Mauldin III, R. L., Montzka, D. D., Orlando, J. J., Shepson, P. B., Sive, B., Staebler, R. M., Tanner, D. J., Thompson, C. R., Turnipseed, A., Ullmann, K., Weinheimer, A. J., and Apel, E. C.: Arctic springtime observations of volatile organic compounds during the OASIS-2009 campaign, *J. Geophys. Res. Atmos.*, 121, 9789–9813, <https://doi.org/10.1002/2015JD024360>, 2016.
- 150 Ji, Y., Huey, L. G., Tanner, D. J., Lee, Y. R., Veres, P. R., Neuman, J. A., Wang, Y., and Wang, X.: A vacuum ultraviolet ion source (VUV-IS) for iodide–chemical ionization mass spectrometry: a substitute for radioactive ion sources, *Atmos. Meas. Tech.*, 13, 3683–3696, <https://doi.org/10.5194/amt-13-3683-2020>, 2020.
- Lee, Y. R., Ji, Y., Tanner, D. J., and Huey, L. G.: A low-activity ion source for measurement of atmospheric gases by chemical ionization mass spectrometry, *Atmos. Meas. Tech.*, 13, 2473–2480, <https://doi.org/10.5194/amt-13-2473-2020>, 2020.
- 155 McKeen, S. A. and Liu, S. C.: Hydrocarbon ratios and photochemical history of air masses, *Geophys. Res. Lett.*, 20, 2363–2366, <https://doi.org/10.1029/93GL02527>, 1993.
- 160 Moore, R. H., Wiggins, E. B., Ahern, A. T., Zimmerman, S., Montgomery, L., Campuzano Jost, P., Robinson, C. E., Ziemba, L. D., Winstead, E. L., Anderson, B. E., Brock, C. A., Brown, M. D., Chen, G., Crosbie, E. C., Guo, H., Jimenez, J. L., Jordan, C. E., Lyu, M., Nault, B. A., Rothfuss, N. E., Sanchez, K. J., Schueneman, M., Shingler, T. J., Shook, M. A., Thornhill, K. L., Wagner, N. L., and Wang, J.: Sizing response of the Ultra-High Sensitivity Aerosol Spectrometer (UHSAS) and Laser Aerosol Spectrometer (LAS) to changes in submicron aerosol composition and refractive index, *Atmos. Meas. Tech.*, 14, 4517–4542, <https://doi.org/10.5194/amt-14-4517-2021>, 2021.
- 165 Nault, B. A., Campuzano-Jost, P., Day, D. A., Schroder, J. C., Anderson, B., Beyersdorf, A. J., Blake, D. R., Brune, W. H., Choi, Y., Corr, C. A., de Gouw, J. A., Dibb, J., DiGangi, J. P., Diskin, G. S., Fried, A., Huey, L. G., Kim, M. J., Knote, C. J., Lamb, K. D., Lee, T., Park, T., Pusede, S. E., Scheuer, E., Thornhill, K. L., Woo, J.-H., and Jimenez, J. L.: Secondary organic aerosol production from local emissions dominates the organic aerosol budget over Seoul, South Korea, during KORUS-AQ, *Atmos. Chem. Phys.*, 18, 17769–17800, <https://doi.org/10.5194/acp-18-17769-2018>, 2018.

- Parrish, D. D., Stohl, A., Forster, C., Atlas, E. L., Blake, D. R., Goldan, P. D., Kuster, W. C., and de Gouw, J. A.: Effects of mixing on evolution of hydrocarbon ratios in the troposphere, *J. Geophys. Res.-Atmos.*, 112, D10S34, <https://doi.org/10.1029/2006JD007583>, 2007.
- 170 Perring, A. E., Pusede, S. E., and Cohen, R. C.: An observational perspective on the atmospheric impacts of alkyl and multifunctional nitrates on ozone and secondary organic aerosol, *Chem. Rev.*, 113, 5848–5870, <https://doi.org/10.1021/cr300520x>, 2013.
- Reinecke, T., Leiminger, M., Jordan, A., Wisthaler, A., and Müller, M.: Ultrahigh sensitivity PTR-MS instrument with a well-defined ion chemistry, *Anal. Chem.*, 95, 11879–11884, <https://doi.org/10.1021/acs.analchem.3c02669>, 2023.
- 175 Rosen, R. S., Wood, E. C., Wooldridge, P. J., Thornton, J. A., Day, D. A., Kuster, W., Williams, E. J., Jobson, B. T., and Cohen, R. C.: Observations of total alkyl nitrates during Texas Air Quality Study 2000: Implications for O<sub>3</sub> and alkyl nitrate photochemistry, *J. Geophys. Res.-Atmos.*, 109, D07303, <https://doi.org/10.1029/2003JD004227>, 2004.
- Sachse, G. W., Collins Jr., J. E., Hill, G. F., Wade, L. O., Burney, L. G., and Ritter, J. A.: Airborne tunable diode laser sensor for high-precision concentration and flux measurements of carbon monoxide and methane, *Proc. SPIE*, 1433, 157–166, <https://doi.org/10.1117/12.46162>, 1991.
- 180 Sachse, G. W., Hill, G. F., Wade, L. O., and Perry, M. G.: Fast-response, high-precision carbon monoxide sensor using a tunable diode laser absorption technique, *J. Geophys. Res.-Atmos.*, 92, 2071–2081, <https://doi.org/10.1029/JD092iD02p02071>, 1987.
- Simpson, I. J., Blake, D. R., Blake, N. J., Meinardi, S., Barletta, B., Hughes, S. C., Fleming, L. T., Crawford, J. H., Diskin, G. S., Emmons, L. K., Fried, A., Guo, H., Peterson, D. A., Wisthaler, A., Woo, J.-H., Barré, J., Gaubert, B., Kim, J., Kim, M. J., Kim, Y., Knote, C., Mikoviny, T., Pusede, S. E., Schroeder, J. R., Wang, Y., Wennberg, P. O., and Zeng, L.: Characterization, sources and reactivity of volatile organic compounds (VOCs) in Seoul and surrounding regions during KORUS-AQ, *Elem. Sci. Anth.*, 8, 37, <https://doi.org/10.1525/elementa.434>, 2020.
- 185 Slusher, D. L., Huey, L. G., Tanner, D. J., Flocke, F. M., and Roberts, J. M.: A thermal dissociation–chemical ionization mass spectrometry (TD-CIMS) technique for the simultaneous measurement of peroxyacyl nitrates and dinitrogen pentoxide, *J. Geophys. Res.-Atmos.*, 109, D19315, <https://doi.org/10.1029/2004JD004670>, 2004.
- St. Clair, J. M., Swanson, A. K., Bailey, S. A., and Hanisco, T. F.: CAFE: a new, improved nonresonant laser-induced fluorescence instrument for airborne in situ measurement of formaldehyde, *Atmos. Meas. Tech.*, 12, 4581–4590, <https://doi.org/10.5194/amt-12-4581-2019>, 2019.
- 195 Teng, A. P., Crouse, J. D., Lee, L., St. Clair, J. M., Cohen, R. C., and Wennberg, P. O.: Hydroxy nitrate production in the OH-initiated oxidation of alkenes, *Atmos. Chem. Phys.*, 15, 4297–4316, <https://doi.org/10.5194/acp-15-4297-2015>, 2015.
- Weinheimer, A. J., Walega, J. G., Ridley, B. A., Gary, B. L., Blake, D. R., Blake, N. J., Rowland, F. S., Sachse, G. W., Anderson, B. E., and Collins, J. E.: Meridional distributions of NO<sub>x</sub>, NO<sub>y</sub>, and other species in the lower stratosphere and upper troposphere during AASE II, *Geophys. Res. Lett.*, 21, 2583–2586, <https://doi.org/10.1029/94GL01897>, 1994.
